# Supplementary material
Source: PubMed Central journal article supplement (PMC10204695)
Supplement: 41574_2023_845_MOESM1_ESM.pdf [file 41574_2023_845_MOESM1_ESM.pdf]

---

# Lipid droplet biogenesis and functions in health and disease

---

In the format provided by the authors and unedited

## Supplementary Information:

### Supplementary box 1: Adipose heterogeneity: size (hypertrophy) vs number (hyperplasia)

Unified by the ability to store energy in lipid droplets, adipose tissue is a remarkably heterogeneous organ varying in colour, anatomical distribution, and function (**Supplementary table B1**). It is comprised of lipid droplet occupying adipocytes among a stromal vascular fraction of fibroblasts, nerve tissue, blood vessels and immune and endothelial cells<sup>1</sup>. Though, adipocyte turnover stabilises to 8.3 years in adulthood<sup>2</sup>, adipose tissue expansion may occur by increasing adipocyte size (hypertrophy), number (hyperplasia) or both. In the former, existing adipocytes become engorged through enhanced lipid droplet growth and accumulation, before supporting the development of the latter, formation of new adipocytes through increased adipogenesis of precursors<sup>3</sup>. As angiogenesis precedes hyperplasia<sup>4</sup>, and thereby enables sufficient vascularisation and adipokine and cytokine signalling upon expansion, hyperplasia is considered an adaptive response<sup>5</sup>. Hypertrophy, on the other hand, is linked to an onslaught of negative metabolic outcomes. It is positively correlated with cell senescence, strongly implicated in the development of inflammation, associated with mitochondrial dysfunction, elevated basal lipolysis, hypoxia, fibrosis, and increased leptin but reduced adiponectin production and secretion<sup>6,7</sup>. Interestingly, hypertrophy predominates visceral adipose tissue expansion, while hyperplasia drives the growth of subcutaneous depots<sup>8</sup>. By regulating the vascular supply of adipose tissue, the sex hormone, estrogen may influence the mode of hypertrophic or hyperplastic expansion, in addition to modulating the typical gynoid or android adipose tissue distribution of premenopausal women or men, respectively<sup>9</sup>. According to the adipose tissue expandability hypothesis, which concurs with both the adipokine and inflammation hypotheses<sup>10,11</sup>, it is this capacity of expansion, rather than the absolute amount of adipose tissue one possesses that may lead to such adverse metabolic complications. This is because beyond the critical point where further expansion is limited, lipotoxicity may ensue through increased circulating lipids and ectopic lipid accumulation in non-adipose insulin-sensitive tissues such as the liver, heart, and skeletal muscle<sup>12</sup>.

Supplementary table B 1: lipid droplet diversity across mammalian cells in health and disease

| Mammalian cell type              | Lipid droplet size ( $\mu\text{m}$ )                               | Composition/ human anatomical distribution                                                                                            | Primary function(s)                                                                                             | References |
|----------------------------------|--------------------------------------------------------------------|---------------------------------------------------------------------------------------------------------------------------------------|-----------------------------------------------------------------------------------------------------------------|------------|
| Adipocyte                        |                                                                    |                                                                                                                                       |                                                                                                                 |            |
| - white                          | Nascent (< 0.2), initial (0.3 - 0.5), expanding (1), giant (> 100) | Unilocular lipid droplet > 90 % cell volume/ subcutaneous (80 %) or visceral (10-20 %)                                                | Energy homeostasis, lipotoxicity prevention                                                                     | 13,14      |
| - brown                          |                                                                    | Multiple small lipid droplets among pool of mitochondria/ supraclavicular, cervical, paraspinal, mediastinal, axillary, and abdominal | Uncouple oxidative phosphorylation from adenosine triphosphate production to enable energy to dissipate as heat | 15,16      |
| - beige                          |                                                                    | Indistinguishable from white during basal conditions but resembles brown upon cold or other $\beta$ -adrenergic stimulant exposure    | Dissipate energy as heat                                                                                        | 17,18      |
| - pink (mammary epithelial cell) |                                                                    | White adipocytes that are pink upon microscopic inspection/ alveoli                                                                   | Produce milk lipid droplets                                                                                     | 19,20      |
| Hepatocyte                       | 60 nm - over 5 $\mu\text{m}$                                       | Cytosolic lipid droplets in close proximity to                                                                                        | Adaptive response to imbalanced fatty acid levels but can progress to various                                   | 21         |

|                                               |                                                                                        |                                                                                                                                                                      |                                                                                                                             |       |
|-----------------------------------------------|----------------------------------------------------------------------------------------|----------------------------------------------------------------------------------------------------------------------------------------------------------------------|-----------------------------------------------------------------------------------------------------------------------------|-------|
|                                               |                                                                                        | mitochondria and the endoplasmic reticulum                                                                                                                           | stages of non-alcoholic fatty liver disease upon chronic imbalance                                                          |       |
| Pancreatic $\beta$ -cell                      | < 1.2 $\mu\text{m}$                                                                    | Both inter- and intralobular deposition                                                                                                                              | Regulate glucose-stimulated insulin secretion, both protect from and contribute to $\beta$ -cell demise                     | 22-24 |
| Cardiomyocyte                                 | < 1 $\mu\text{m}$                                                                      | Small lipid droplets associated with clusters of mitochondria                                                                                                        | Cardioprotective but accumulation can lead to cardiac lipotoxicity, cardiomyopathy and heart failure                        | 25,26 |
| Enterocyte/<br>intestinal<br>epithelial cells | 2.7, 4.4, 3.5 $\mu\text{m}$ after 1.5, 3 and 6 hr olive oil treatment in C57BL/6J mice | Triacylglycerol, diacylglycerol, free cholesterol, cholesterol esters are the major lipids, but sphingomyelins, phosphatidylcholines and ceramides were also present | Contribute to postprandial triacylglycerol concentration regulation, store/metabolise lipophilic vitamins and digested food | 27,28 |
| Dermal adipocyte                              | Various                                                                                | Dermal cones superficial to subcutaneous white adipose tissue                                                                                                        | Mechanical cushioning, thermoregulation, hair follicle cycling, wound healing                                               | 5     |
| Macrophage                                    | Variable/<br>dependant<br>on context                                                   | Depending on stress conditions, lipid droplets can either be composed of triacylglycerol (e.g., hypoxia exposed) or cholesterol esters                               | Contribute to the pathogenesis of several infectious and non-infectious diseases                                            | 29    |

|  |  |                                    |  |  |
|--|--|------------------------------------|--|--|
|  |  | (e.g., in presence of cholesterol) |  |  |
|--|--|------------------------------------|--|--|

## Supplementary box 2: lipid droplet biogenesis vs adipogenesis: mutual factors and mechanistic differences

Broadly involved in the anabolic arm of lipid metabolism, lipid droplet biogenesis and adipogenesis are mechanistically distinct processes united by several mutual factors. Unlike lipid droplet biogenesis which constitutes the creation of neutral lipid storage organelles, adipogenesis involves the generation of new adipocytes via two main steps. In the initial commitment phase, mesenchymal precursors commit to the adipocyte lineage, becoming preadipocytes with unaltered morphology<sup>30</sup>. During differentiation, preadipocytes then change conformation to enable lipid accumulation and fatty acid binding protein 4, glucose transporter 4, leptin and adiponectin expression<sup>31</sup>. Countless extranuclear factors regulate this process, including local insulin, triiodothyronine, glucocorticoid, brain natriuretic peptide, Wnt, transforming growth factor- $\beta$  and hedgehog signalling, as well as systemic influences from circadian rhythms, reactive oxygen species and chronic inflammation<sup>5,32</sup>. However, the most critical factor for white, brown, and beige adipocyte differentiation remains the transcriptional master regulator, PPAR- $\gamma$ <sup>33-35</sup>. Whilst PPAR- $\gamma$  is both necessary and sufficient for adipogenesis<sup>36</sup>, it can be functionally synergised by its coactivator, C/EBP $\alpha$ <sup>37</sup>, and potently inhibited by phosphatidic acid and its derivative, cyclic-phosphatidic acid<sup>38,39</sup>.

Originally identified for its role in adipogenesis<sup>40</sup>, and subsequently linked to lipid droplet formation<sup>41,42</sup>, seipin has emerged as the central factor unifying the mutual influencers of these processes. Not only does it interact with phosphatidic acid among other phospholipids<sup>43</sup>, its interaction with key enzymes involved in lipogenesis has provided mechanistic insights into its dual roles. Through binding to and putatively inhibiting the rate-limiting enzyme in glycerolipid synthesis, GPAT3/4<sup>44</sup>, Seipin may reduce phosphatidic acid levels, preventing PPAR- $\gamma$  inhibition and enabling adipogenesis. Moreover, its simultaneous and direct interaction with the PA producing, AGPAT2 and the phosphatidic acid phosphatase, lipin 1<sup>45</sup> might provide a mechanism for both phosphatidic acid clearance and lipogenesis regulation by seipin. Although AGPAT2 functions to synthesise phosphatidic acid, its deficiency causes a nearly three-fold increase in the level of phosphatidic acid. The recently identified direct interaction between AGPAT2 and CDS1/2<sup>46</sup> explains this phosphatidic acid increase under

AGPAT2 deficiency and also supports previous findings linking CDS proteins with the regulation of both cellular (lipid droplet formation) and systemic (adipogenesis) lipid storage<sup>47</sup>.

### Supplementary box 3: Lipolysis, lipophagy and chaperone-mediated autophagy

Activated during energy deprivation or stress, lipolysis, lipophagy and chaperone-mediated autophagy (CMA) are three distinct yet cooperative processes essential for regulating the degradation, and in turn size, of cLDs. In cytosolic lipolysis, triacylglycerols are sequentially hydrolysed by the neutral lipases, patatin-like phospholipase domain-containing protein 2 (PNPLA2), hormone sensitive lipase (HSL) and monoglyceride lipase<sup>48</sup>. In both lipophagy and CMA, lysosomal degradation catalysed by lysosomal acid lipase (LAL), or the chaperone, heat shock cognate protein 70 occurs, respectively<sup>49</sup>. Initially considered parallel processes, recent findings have revealed several functional and synergistic links between them. In particular, CMA has been shown to promote neutral lipolysis through the direct binding of heat shock cognate protein 70 to the KFERQ pentapeptide motif on perilipin 2 and 3<sup>50</sup>, allowing PNPLA2 unrestricted lipolytic access to the surface of cLDs. Moreover, whilst lipophagy has been found to precede lipolysis during starvation<sup>51,52</sup>, lipolysis of large cLDs have been shown to supply small cytoplasmic lipid droplets for subsequent lipophagic digestion<sup>21</sup>. Furthermore, mammalian target of rapamycin complex 1 not only acts as the prominent negative regulator of lipophagy through its Ser142 and S211 phosphorylation and cytoplasmic sequestration of transcription factor EB<sup>53,54</sup>, it is also implicated as an inhibitor of PNPLA2-stimulated lipolysis via its upregulation of early growth response protein 1<sup>55</sup>.

Interestingly, both activation and inhibition of these interconnected processes is strongly and amply connected with disease. Unrestrained basal lipolysis, for example, is well established in the development of insulin resistance sequelae and cancer cachexia<sup>12,56</sup>. In turn, pharmacological inhibition<sup>57,58</sup> or genetic depletion<sup>59–61</sup> of PNPLA2, HSL and monoglyceride lipase, have been shown to improve insulin sensitivity. Despite this, humans deficient in PNPLA2 or its coactivator, abhydrolase domain containing 5 experience systemic triacylglycerol accumulation in the form of neutral lipid storage disease with myopathy (NLSDM) or ichthyosis (NLSDI), respectively<sup>62,63</sup>. Likewise, LAL deficient mice demonstrate enhanced glucose tolerance<sup>64</sup>, and humans with mutations in its encoding gene exhibit Wolman or cholesterol ester storage disease, depending on the extent of lost LAL activity<sup>65</sup>. Finally, whereas downregulation of CMA is linked to increased lipogenesis, lipid uptake and synthesis,

leading to fatty liver disease and atherosclerosis<sup>66,67</sup>, upregulation of CMA may also contribute to the pathogenesis of the autoimmune disorder, lupus<sup>68</sup>.

## References:

1. Cypess, A. M. Reassessing Human Adipose Tissue. *N. Engl. J. Med.* **386**, 768–779 (2022).
2. Spalding, K. L. *et al.* Dynamics of fat cell turnover in humans. *Nature* **453**, 783–787 (2008).
3. Haczeyni, F., Bell-Anderson, K. S. & Farrell, G. C. Causes and mechanisms of adipocyte enlargement and adipose expansion. *Obes. Rev. Off. J. Int. Assoc. Study Obes.* **19**, 406–420 (2018).
4. Corvera, S., Solivan-Rivera, J. & Yang Loureiro, Z. Angiogenesis in adipose tissue and obesity. *Angiogenesis* **25**, 439–453 (2022).
5. Ghaben, A. L. & Scherer, P. E. Adipogenesis and metabolic health. *Nat. Rev. Mol. Cell Biol.* **20**, 242–258 (2019).
6. Meister, B. M. *et al.* Healthy versus Unhealthy Adipose Tissue Expansion: the Role of Exercise. *J. Obes. Metab. Syndr.* **31**, 37–50 (2022).
7. Ye, R. Z., Richard, G., Gévy, N., Tchernof, A. & Carpentier, A. C. Fat Cell Size: Measurement Methods, Pathophysiological Origins, and Relationships With Metabolic Dysregulations. *Endocr. Rev.* **43**, 35–60 (2022).
8. Wang, Q. A., Tao, C., Gupta, R. K. & Scherer, P. E. Tracking adipogenesis during white adipose tissue development, expansion and regeneration. *Nat. Med.* **19**, 1338–1344 (2013).
9. Palmer, B. F. & Clegg, D. J. The sexual dimorphism of obesity. *Mol. Cell. Endocrinol.* **402**, 113–119 (2015).
10. Virtue, S. & Vidal-Puig, A. It's not how fat you are, it's what you do with it that counts. *PLoS Biol.* **6**, e237 (2008).
11. Virtue, S. & Vidal-Puig, A. Adipose tissue expandability, lipotoxicity and the Metabolic Syndrome--an allostatic perspective. *Biochim. Biophys. Acta* **1801**, 338–349 (2010).
12. Morigny, P., Houssier, M., Mouisel, E. & Langin, D. Adipocyte lipolysis and insulin resistance. *Biochimie* **125**, 259–266 (2016).



13. Walker, G. E., Marzullo, P., Ricotti, R., Bona, G. & Prodam, F. The pathophysiology of abdominal adipose tissue depots in health and disease. *Horm. Mol. Biol. Clin. Investig.* **19**, (2014).
14. Qi, Y., Sun, L. & Yang, H. Lipid droplet growth and adipocyte development: mechanistically distinct processes connected by phospholipids. *Biochim. Biophys. Acta BBA - Mol. Cell Biol. Lipids* **1862**, 1273–1283 (2017).
15. Cinti, S. The adipose organ: morphological perspectives of adipose tissues. *Proc. Nutr. Soc.* **60**, 319–328 (2001).
16. Becher, T. *et al.* Brown adipose tissue is associated with cardiometabolic health. *Nat. Med.* **27**, 58–65 (2021).
17. Sanchez-Gurmaches, J. & Guertin, D. A. Adipocyte lineages: tracing back the origins of fat. *Biochim. Biophys. Acta* **1842**, 340–351 (2014).
18. Kaisanlahti, A. & Glumoff, T. Browning of white fat: agents and implications for beige adipose tissue to type 2 diabetes. *J. Physiol. Biochem.* **75**, 1–10 (2019).
19. Giordano, A., Smorlesi, A., Frontini, A., Barbatelli, G. & Cinti, S. White, brown and pink adipocytes: the extraordinary plasticity of the adipose organ. *Eur. J. Endocrinol.* **170**, R159-171 (2014).
20. Cinti, S. Pink Adipocytes. *Trends Endocrinol. Metab. TEM* **29**, 651–666 (2018).
21. Schott, M. B. *et al.* Lipid droplet size directs lipolysis and lipophagy catabolism in hepatocytes. *J. Cell Biol.* **218**, 3320–3335 (2019).
22. Wagner, R. *et al.* Metabolic implications of pancreatic fat accumulation. *Nat. Rev. Endocrinol.* **18**, 43–54 (2022).
23. Petrov, M. S. & Taylor, R. Intra-pancreatic fat deposition: bringing hidden fat to the fore. *Nat. Rev. Gastroenterol. Hepatol.* **19**, 153–168 (2022).
24. Tong, X., Liu, S., Stein, R. & Imai, Y. Lipid Droplets' Role in the Regulation of  $\beta$ -Cell Function and  $\beta$ -Cell Demise in Type 2 Diabetes. *Endocrinology* **163**, bqac007 (2022).

25. Wang, H., Lei, M., Hsia, R. & Sztalryd, C. Analysis of lipid droplets in cardiac muscle. *Methods Cell Biol.* **116**, 129–149 (2013).
26. Varghese, M. *et al.* Adipocyte lipolysis affects Perilipin 5 and cristae organization at the cardiac lipid droplet-mitochondrial interface. *Sci. Rep.* **9**, 4734 (2019).
27. Zhu, J., Lee, B., Buhman, K. K. & Cheng, J.-X. A dynamic, cytoplasmic triacylglycerol pool in enterocytes revealed by ex vivo and in vivo coherent anti-Stokes Raman scattering imaging. *J. Lipid Res.* **50**, 1080–1089 (2009).
28. Beilstein, F., Carrière, V., Leturque, A. & Demignot, S. Characteristics and functions of lipid droplets and associated proteins in enterocytes. *Exp. Cell Res.* **340**, 172–179 (2016).
29. Guerrini, V. & Gennaro, M. L. Foam Cells: One Size Doesn't Fit All. *Trends Immunol.* **40**, 1163–1179 (2019).
30. Cawthorn, W. P., Scheller, E. L. & MacDougald, O. A. Adipose tissue stem cells meet preadipocyte commitment: going back to the future. *J. Lipid Res.* **53**, 227–246 (2012).
31. Cristancho, A. G. & Lazar, M. A. Forming functional fat: a growing understanding of adipocyte differentiation. *Nat. Rev. Mol. Cell Biol.* **12**, 722–734 (2011).
32. Moreno-Navarrete, J. M. & Fernández-Real, J. M. Adipocyte Differentiation. in *Adipose Tissue Biology* (ed. Symonds, M. E.) 69–90 (Springer International Publishing, 2017). doi:10.1007/978-3-319-52031-5\_3.
33. Tontonoz, P., Hu, E., Devine, J., Beale, E. G. & Spiegelman, B. M. PPAR gamma 2 regulates adipose expression of the phosphoenolpyruvate carboxykinase gene. *Mol. Cell. Biol.* **15**, 351–357 (1995).
34. Inagaki, T., Sakai, J. & Kajimura, S. Transcriptional and epigenetic control of brown and beige adipose cell fate and function. *Nat. Rev. Mol. Cell Biol.* **17**, 480–495 (2016).
35. Wang, W. & Seale, P. Control of brown and beige fat development. *Nat. Rev. Mol. Cell Biol.* **17**, 691–702 (2016).
36. Farmer, S. R. Transcriptional control of adipocyte formation. *Cell Metab.* **4**, 263–273 (2006).

37. Lefterova, M. I. *et al.* PPARgamma and C/EBP factors orchestrate adipocyte biology via adjacent binding on a genome-wide scale. *Genes Dev.* **22**, 2941–2952 (2008).
38. Tsukahara, T. *et al.* Phospholipase D2-dependent inhibition of the nuclear hormone receptor PPARgamma by cyclic phosphatidic acid. *Mol. Cell* **39**, 421–432 (2010).
39. Stapleton, C. M. *et al.* Lysophosphatidic acid activates peroxisome proliferator activated receptor- $\gamma$  in CHO cells that over-express glycerol 3-phosphate acyltransferase-1. *PLoS One* **6**, e18932 (2011).
40. Magré, J. *et al.* Identification of the gene altered in Berardinelli-Seip congenital lipodystrophy on chromosome 11q13. *Nat. Genet.* **28**, 365–370 (2001).
41. Szymanski, K. M. *et al.* The lipodystrophy protein seipin is found at endoplasmic reticulum lipid droplet junctions and is important for droplet morphology. *Proc. Natl. Acad. Sci.* **104**, 20890–20895 (2007).
42. Fei, W. *et al.* Fld1p, a functional homologue of human seipin, regulates the size of lipid droplets in yeast. *J. Cell Biol.* **180**, 473–482 (2008).
43. Yan, R. *et al.* Human SEIPIN Binds Anionic Phospholipids. *Dev. Cell* **47**, 248–256.e4 (2018).
44. Pagac, M. *et al.* SEIPIN Regulates Lipid Droplet Expansion and Adipocyte Development by Modulating the Activity of Glycerol-3-phosphate Acyltransferase. *Cell Rep.* **17**, 1546–1559 (2016).
45. Talukder, Md. M. U., Sim, M. F. M., O’Rahilly, S., Edwardson, J. M. & Rochford, J. J. Seipin oligomers can interact directly with AGPAT2 and lipin 1, physically scaffolding critical regulators of adipogenesis. *Mol. Metab.* **4**, 199–209 (2015).
46. Mak, H. Y. *et al.* AGPAT2 interaction with CDP-diacylglycerol synthases promotes the flux of fatty acids through the CDP-diacylglycerol pathway. *Nat. Commun.* **12**, 6877 (2021).
47. Qi, Y. *et al.* CDP-diacylglycerol synthases regulate the growth of lipid droplets and adipocyte development. *J. Lipid Res.* **57**, 767–780 (2016).

48. Frühbeck, G., Méndez-Giménez, L., Fernández-Formoso, J.-A., Fernández, S. & Rodríguez, A. Regulation of adipocyte lipolysis. *Nutr. Res. Rev.* **27**, 63–93 (2014).
49. Kloska, A., Węsierska, M., Malinowska, M., Gabig-Cimińska, M. & Jakóbkiewicz-Banecka, J. Lipophagy and Lipolysis Status in Lipid Storage and Lipid Metabolism Diseases. *Int. J. Mol. Sci.* **21**, 6113 (2020).
50. Kaushik, S. & Cuervo, A. M. Degradation of lipid droplet-associated proteins by chaperone-mediated autophagy facilitates lipolysis. *Nat. Cell Biol.* **17**, 759–770 (2015).
51. Rambold, A. S., Cohen, S. & Lippincott-Schwartz, J. Fatty acid trafficking in starved cells: regulation by lipid droplet lipolysis, autophagy, and mitochondrial fusion dynamics. *Dev. Cell* **32**, 678–692 (2015).
52. Nguyen, T. B. *et al.* DGAT1-Dependent Lipid Droplet Biogenesis Protects Mitochondrial Function during Starvation-Induced Autophagy. *Dev. Cell* **42**, 9-21.e5 (2017).
53. Settembre, C. *et al.* A lysosome-to-nucleus signalling mechanism senses and regulates the lysosome via mTOR and TFEB. *EMBO J.* **31**, 1095–1108 (2012).
54. Martina, J. A., Chen, Y., Gucek, M. & Puertollano, R. MTORC1 functions as a transcriptional regulator of autophagy by preventing nuclear transport of TFEB. *Autophagy* **8**, 903–914 (2012).
55. Chakrabarti, P. *et al.* Insulin inhibits lipolysis in adipocytes via the evolutionarily conserved mTORC1-Egr1-ATGL-mediated pathway. *Mol. Cell. Biol.* **33**, 3659–3666 (2013).
56. Sun, X. *et al.* Fat Wasting Is Damaging: Role of Adipose Tissue in Cancer-Associated Cachexia. *Front. Cell Dev. Biol.* **8**, 33 (2020).
57. Girisso, A. *et al.* Partial inhibition of adipose tissue lipolysis improves glucose metabolism and insulin sensitivity without alteration of fat mass. *PLoS Biol.* **11**, e1001485 (2013).
58. Schweiger, M. *et al.* Pharmacological inhibition of adipose triglyceride lipase corrects high-fat diet-induced insulin resistance and hepatosteatosis in mice. *Nat. Commun.* **8**, 14859 (2017).

59. Park, S.-Y. *et al.* Hormone-sensitive lipase knockout mice have increased hepatic insulin sensitivity and are protected from short-term diet-induced insulin resistance in skeletal muscle and heart. *Am. J. Physiol. Endocrinol. Metab.* **289**, E30-39 (2005).
60. Hoy, A. J. *et al.* Adipose triglyceride lipase-null mice are resistant to high-fat diet-induced insulin resistance despite reduced energy expenditure and ectopic lipid accumulation. *Endocrinology* **152**, 48–58 (2011).
61. Taschler, U. *et al.* Monoglyceride Lipase Deficiency in Mice Impairs Lipolysis and Attenuates Diet-induced Insulin Resistance. *J. Biol. Chem.* **286**, 17467–17477 (2011).
62. Lefèvre, C. *et al.* Mutations in CGI-58, the gene encoding a new protein of the esterase/lipase/thioesterase subfamily, in Chanarin-Dorfman syndrome. *Am. J. Hum. Genet.* **69**, 1002–1012 (2001).
63. Fischer, J. *et al.* The gene encoding adipose triglyceride lipase (PNPLA2) is mutated in neutral lipid storage disease with myopathy. *Nat. Genet.* **39**, 28–30 (2007).
64. Radović, B. *et al.* Lysosomal acid lipase regulates VLDL synthesis and insulin sensitivity in mice. *Diabetologia* **59**, 1743–1752 (2016).
65. Aslanidis, C. *et al.* Genetic and Biochemical Evidence That CESD and Wolman Disease Are Distinguished by Residual Lysosomal Acid Lipase Activity. *Genomics* **33**, 85–93 (1996).
66. Schneider, J. L., Suh, Y. & Cuervo, A. M. Deficient Chaperone-Mediated Autophagy in Liver Leads to Metabolic Dysregulation. *Cell Metab.* **20**, 417–432 (2014).
67. Qiao, L. *et al.* Deficient Chaperone-Mediated Autophagy Promotes Inflammation and Atherosclerosis. *Circ. Res.* **129**, 1141–1157 (2021).
68. Wang, F., Tasset, I., Cuervo, A. M. & Muller, S. In Vivo Remodeling of Altered Autophagy-Lysosomal Pathway by a Phosphopeptide in Lupus. *Cells* **9**, 2328 (2020).
